# Supplementary material for: Collagen-derived matricryptins promote inhibitory nerve terminal formation in the developing neocortex
Source: PubMed Central journal article supplement — J Cell Biol. 2016 Mar 14;212(6):721–36. doi: 10.1083/jcb.201509085 (PMC4792079; doi:10.1083/jcb.201509085), 2016-03-14
Supplement: JCB_201509085_sm.pdf [file JCB_201509085_sm.pdf]

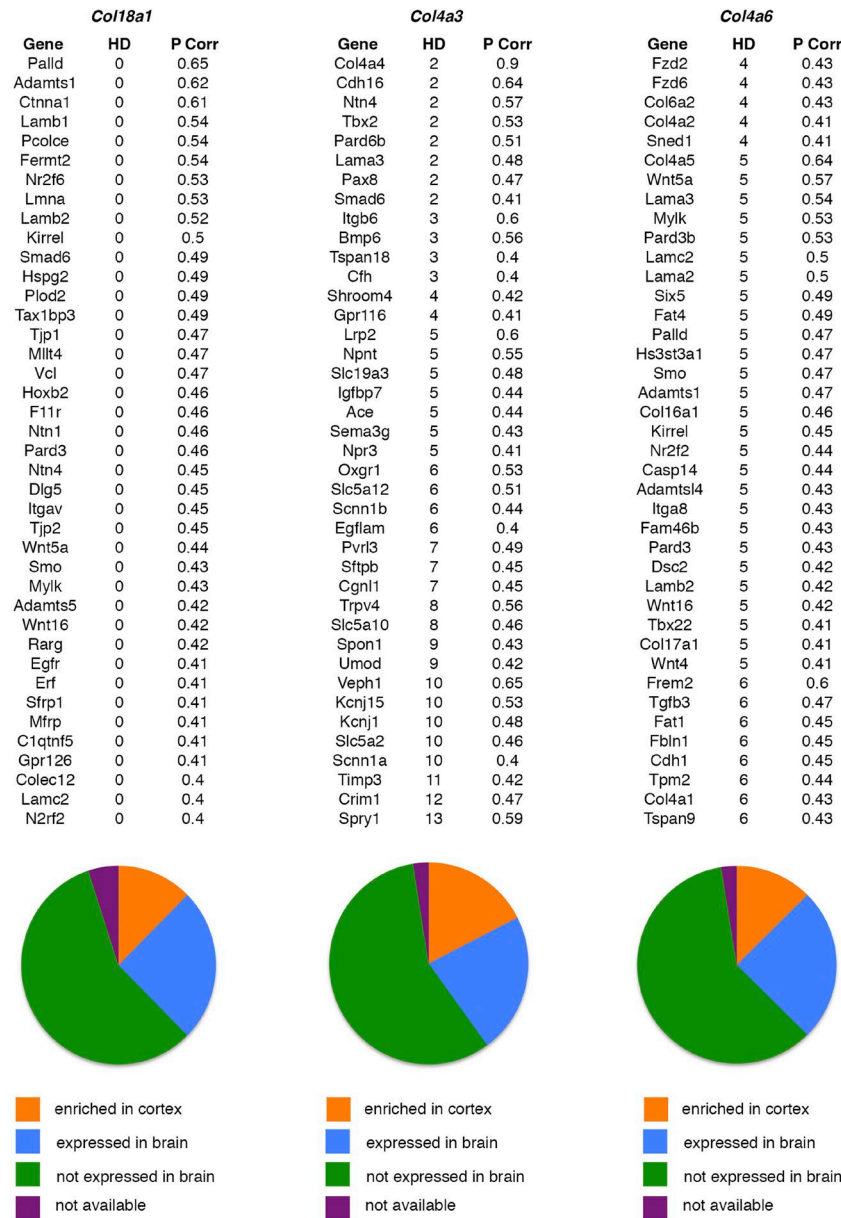

Figure S1. **Analysis of synaptogenic collagen genes with EvoCor.** Top genes predicted by EvoCor analysis as being functionally related to mouse *col18a1*, *col4a3*, and *col4a6* based on evolutionary history and tissue-wide gene expression patterns. HD, Hamming distance; PCorr, Pearson correlation. Tissue distribution of the 40 genes listed are shown in pie charts below each gene list. Only ~12% of *col18a1*, ~16% of *col4a3*, and ~12% of *col4a6* related top genes predicted by EvoCor analysis are enriched in mouse cortex.

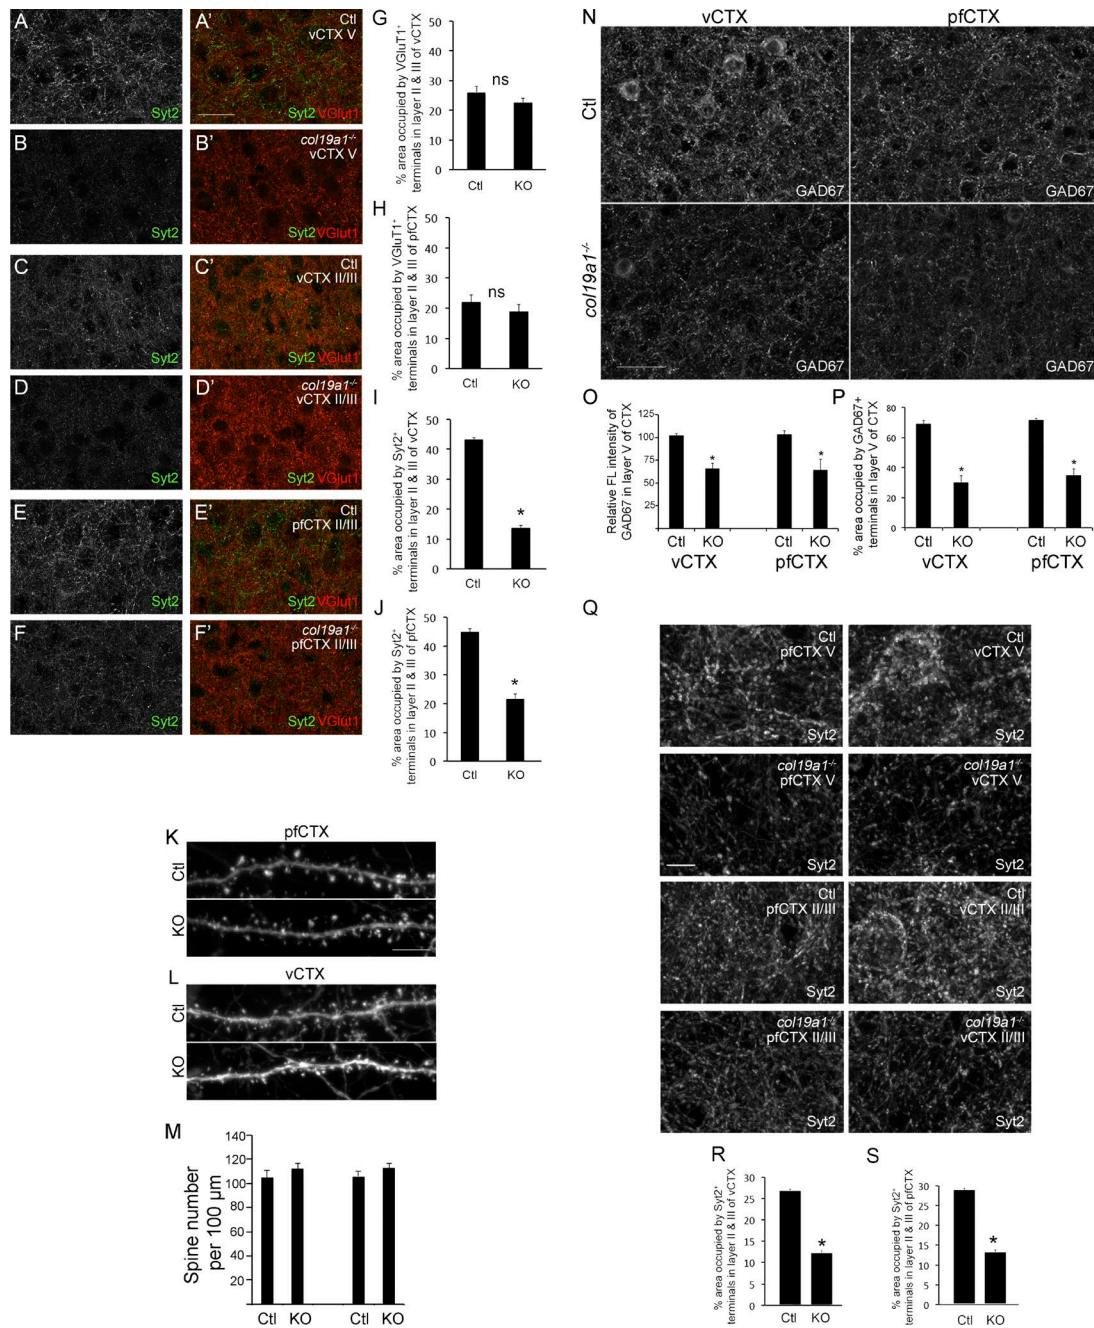

**Figure S2. Loss of collagen XIX leads to impaired inhibitory synapse formation.** (A–F) Immunostaining for Syt2 and VGLuT1 in layer II/III and V of vCTX and pfCTX in P11 WT controls (Ctl) and *col19a1*<sup>-/-</sup> mutants. A–F depict Syt2 immunolabeling; A'–F' depict merged overlay of Syt2 and VGLuT1 immunolabeling. Bar, 25 μm. (G–J) Quantification of the area occupied by VGLuT1 and Syt2 immunoreactivity in layer II/III of vCTX (M and O) and pfCTX (N and P) in P11 WT controls (Ctl) and *col19a1*<sup>-/-</sup> mutants. Data are mean ± SEM; n = 4. \*, Differs from controls by P < 0.001 by Student's *t* test. ns, no statistical difference by Student's *t* test. (K and L) Dendritic spines were visualized in layer V pyramidal neurons in pfCTX and vCTX of *col19a1*<sup>+/+::thy1-yfp lineH</sup> (Ctl) and *col19a1*<sup>-/-::thy1-yfp lineH</sup> (KO) mice. Bar, 5 μm. (M) Numbers of dendritic spines per 100 μm were quantified in pfCTX and vCTX of *col19a1*<sup>+/+::thy1-yfp lineH</sup> (Ctl) and *col19a1*<sup>-/-::thy1-yfp lineH</sup> (KO) mice. Data are mean ± SEM; n = 3. ns, no statistical difference by Student's *t* test. (N) IHC for GAD67 in layer V of vCTX and pfCTX in P11 WT controls (Ctl) and *col19a1*<sup>-/-</sup> mutants. Bar, 40 μm. (O) Quantification of the relative fluorescent intensity of GAD67 in layer V of vCTX and pfCTX in P23 control and KO. Data are mean ± SEM; n = 4. \*, Differs from controls by P < 0.001 by Student's *t* test. (P) Quantification of the area occupied by GAD67 immunoreactivity in layer V of vCTX and pfCTX in P23 control and KO. Data are mean ± SEM; n = 4. \*, Differs from controls by P < 0.001 by Student's *t* test. (Q) Immunostaining for Syt2 in layer II/III and V of pfCTX and vCTX in P56 WT controls (Ctl) and *col19a1*<sup>-/-</sup> mutants. Bar, 5 μm. (R and S) Quantification of the area occupied by Syt2 immunoreactivity in layer II/III of vCTX (R) and pfCTX (S) in P56 WT controls (Ctl) and *col19a1*<sup>-/-</sup> mutants. Data are mean ± SEM; n = 4. \*, Differs from controls by P < 0.001 by Student's *t* test.

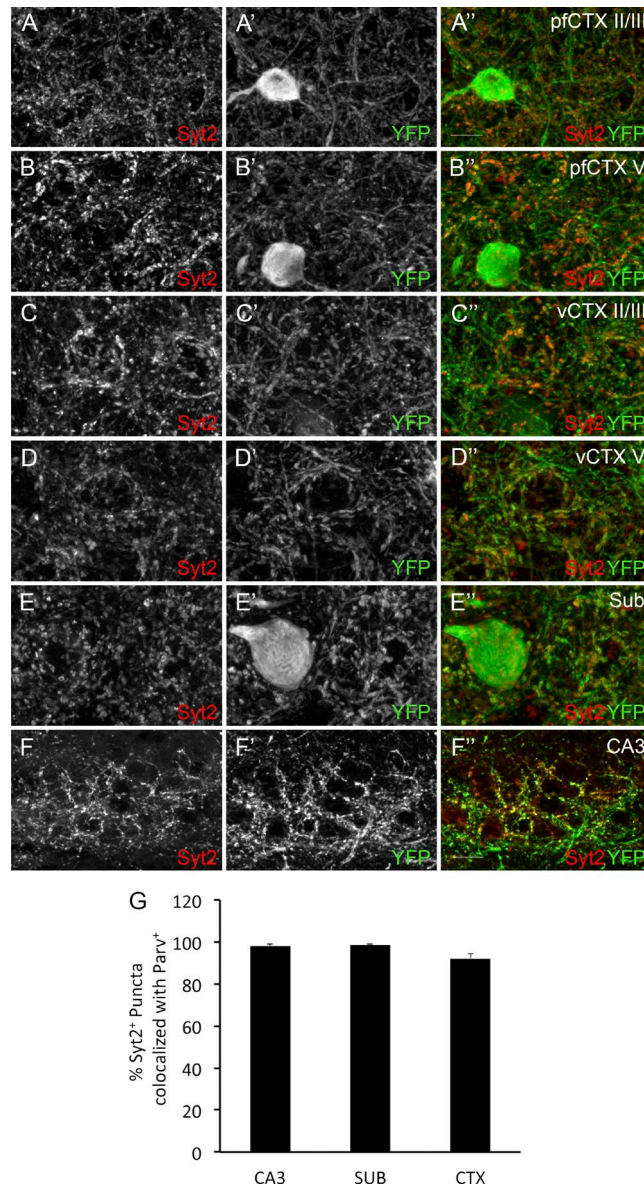

Figure S3. **Syt2<sup>+</sup> terminals originated from Parv<sup>+</sup> GABAergic interneurons in cortex and HP.** (A and B) Immunostaining for Syt2 in layer II/III (A) and layer V (B) of pfCTX in adult *parv-cre::thy1-stop-yfp* transgenic mice. A and B depict Syt2 immunolabeling; A' and B' depict YFP-*parv*; and A'' and B'' depict merged overlay of Syt2 immunolabeling and YFP-*parv*. Bar, 8  $\mu$ m. (C and D) Immunostaining for Syt2 in layer II/III (C) and layer V (D) of vCTX in adult *parv-cre::thy1-stop-yfp* transgenic mice. C and D depict Syt2 immunolabeling; C' and D' depict YFP-*parv*; and C'' and D'' depict merged overlay of Syt2 immunolabeling and YFP-*parv*. (E) Immunostaining for Syt2 in subiculum of adult *parv-cre::thy1-stop-yfp* transgenic mice. E depicts Syt2 immunolabeling; E' depicts YFP-*parv*; and E'' depicts merged overlay of Syt2 immunolabeling and YFP-*parv*. (F) Immunostaining for Syt2 in subiculum of adult *parv-cre::thy1-stop-yfp* transgenic mice. F depicts Syt2 immunolabeling; F' depicts YFP-*parv*; and F'' depicts merged overlay of Syt2 immunolabeling and YFP-*parv*. Bar, 20  $\mu$ m. (G) Quantification of the percentage of Syt2<sup>+</sup> terminals in YFP-*parv* interneurons of CTX, subiculum, and CA3.

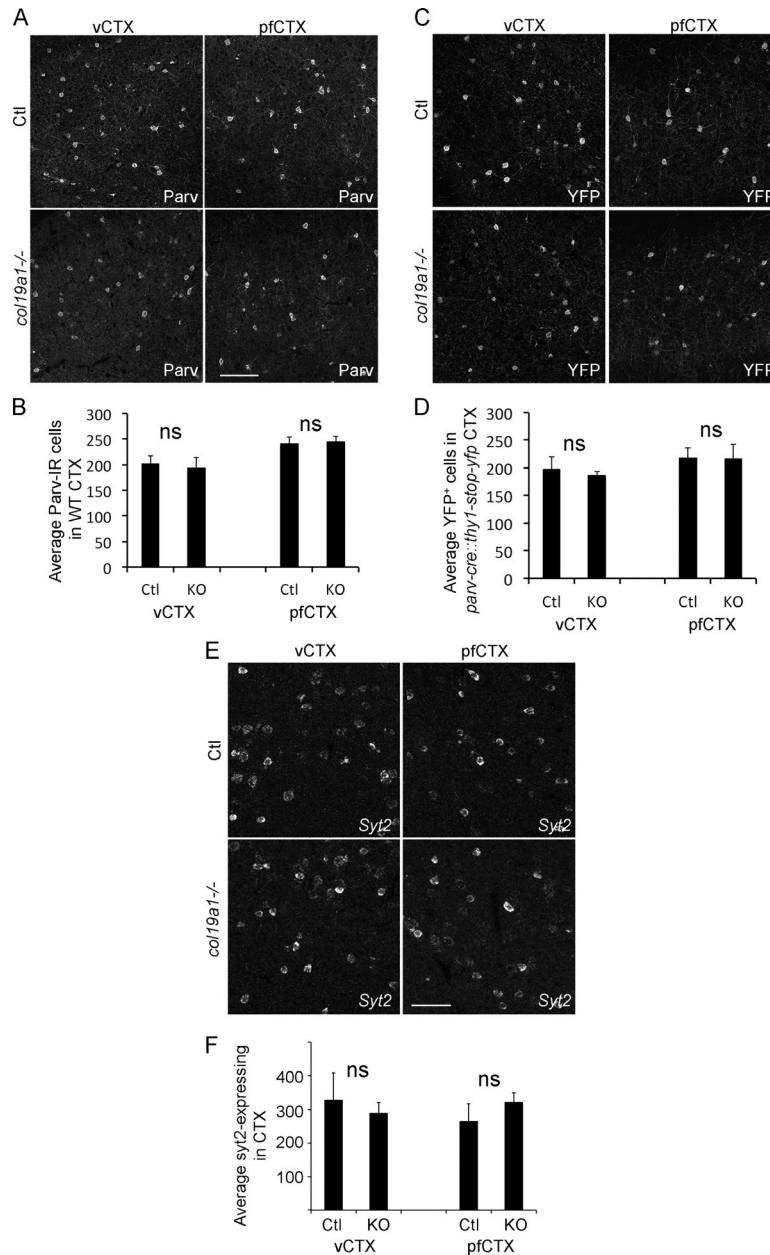

Figure S4. **Loss of collagen XIX does not alter the number or distribution of Parv<sup>+</sup> or Syt2<sup>+</sup> interneurons.** (A) Immunostaining for Parv in layer V of pfCTX and vCTX in P23 WT controls (Ctl) and *col19a1*<sup>-/-</sup> mutants (KO). Bar, 150  $\mu$ m. (B) Quantification of the number of Parv<sup>+</sup> cell bodies in pfCTX and vCTX of P23 control and KO. Data are mean  $\pm$  SEM; *n* = 3. ns, no statistical difference by Student's *t* test. (C) Immunostaining for YFP in layer V of pfCTX and vCTX in P27 *parv-cre::thy1-stop-yfp* controls (Ctl) and *col19a1*<sup>-/-</sup>::*parv-cre::thy1-stop-yfp* mutants (KO). (D) Quantification of the number of YFP<sup>+</sup> cell bodies in pfCTX and vCTX of P27 control and KO (see C). Data are mean  $\pm$  SEM; *n* = 3. ns, no statistical difference by Student's *t* test. Bar, 120  $\mu$ m. (E) In situ hybridization for *syt2* mRNA in layer V of pfCTX and vCTX in P56 controls (Ctl) and *col19a1*<sup>-/-</sup> mutants (KO). Bar, 80  $\mu$ m. (F) Quantification of the number of *syt2*<sup>+</sup> cell bodies in pfCTX and vCTX of P56 control and KO (see E). Data are mean  $\pm$  SEM; *n* = 3. ns, no statistical difference by Student's *t* test.

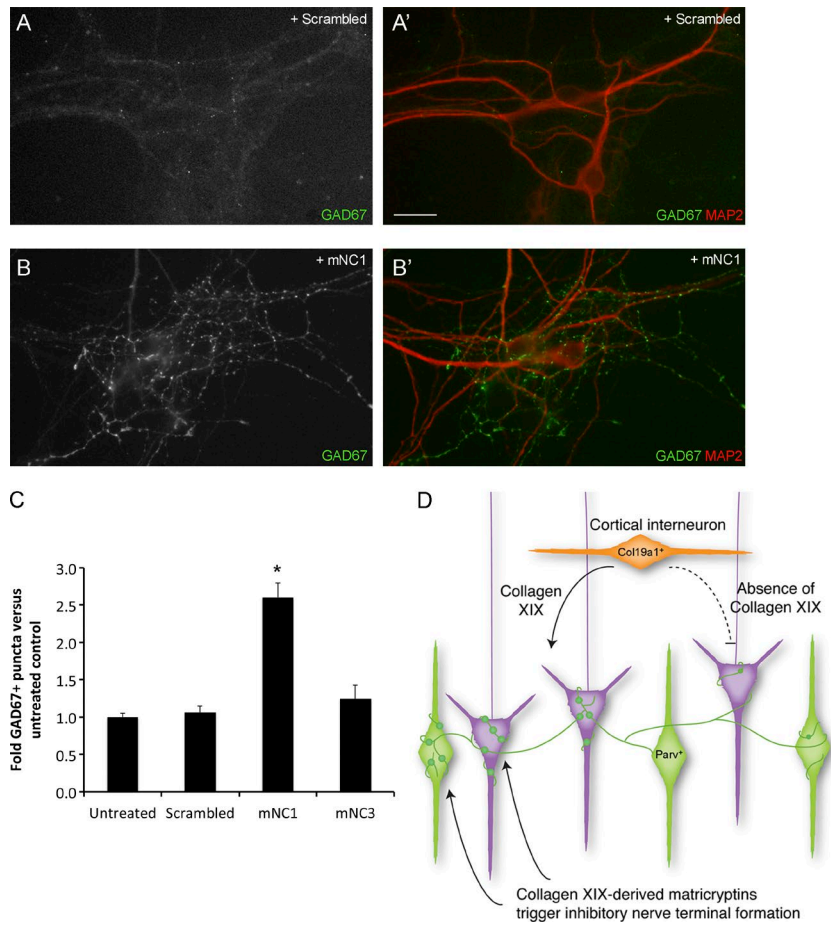

Figure S5. **In vitro application of mNC1 triggers an increase in GAD67+ puncta.** (A and B) Mouse NC1 (mNC1) triggers GAD67+ terminal formation. A and B depict GAD67 immunolabeling in HP cultures treated with Scrambled or mNC1 peptides; A' and B' depict merged overlays of GAD67- and MAP2-immunolabeling in these cultures. Bar, 20  $\mu$ m. (C) Quantitation of mNC1-triggered GAD67+ puncta formation in HP neurons. Data are mean  $\pm$  SEM;  $n = 3$ . \*, Differs from controls, Scrambled, and mNC3 peptides by  $P < 0.001$  by Tukey-Kramer test for difference between means. (D) Schematic depiction of the novel role for collagen XIX in Parv+ axosomatic synapse formation.
